# Supplementary material for: Assessing the role of live poultry trade in community-structured transmission of avian influenza in China
Source: PubMed Central journal article supplement (PMC7084072; doi:10.1073/pnas.1906954117), 2020-03-02
Supplement: pnas.1906954117.sapp.pdf [file pnas.1906954117.sapp.pdf]

1

## 2 Supplementary Information for

3

4 Assessing the role of live poultry trade in community-structured transmission of avian  
5 influenza in China

6

7 Qiqi Yang<sup>a</sup>, Xiang Zhao<sup>b</sup>, Philippe Lemey<sup>c</sup>, Marc A. Suchard<sup>d</sup>, Yuhai Bi<sup>e,f</sup>, Weifeng  
8 Shi<sup>g</sup>, Di Liu<sup>h</sup>, Wenbao Qi<sup>i</sup>, Guogang Zhang<sup>j</sup>, Nils Chr. Stenseth<sup>k,1</sup>, Oliver G. Pybus<sup>l,m,1</sup>,  
9 Huaiyu Tian<sup>a,1</sup>

10

11 Huaiyu Tian

12 tianhuaiyu@gmail.com;

13

14 Oliver G. Pybus

15 oliver.pybus@zoo.ox.ac.uk;

16

17 Nils Chr. Stenseth

18 n.c.stenseth@ibv.uio.no

19

### 20 **This PDF file includes:**

21

22       Supplementary text

23       Figs. S1 to S15

24       Tables S1 to S4

25       Captions for Dataset S1, S2, S3

26       References for SI reference citations

27

### 28 **Other supplementary materials for this manuscript include the following:**

29

30 Dataset S1, S2, S3 (separate files)

31 Nucleotide alignments, BEAST XML files, and scripts for reconstruction of poultry  
32 trade network, community detection, and the following robustness test (available at  
33 the GitHub repository: <https://github.com/kikiyang/AIVPoultryChina>)

34 **Supplementary Information Text**

35 **SI Materials and Methods**

36 **Sequence data.** We accessed haemagglutinin (HA) gene segment sequences of H5N1  
37 AIVs sampled from 1996 to 2014 from the GenBank database, and obtained HA gene  
38 segment sequences for H7N9 and H5N6 AIVs sampled from 2013 to 2017 from the  
39 GISAID database. Duplicate entries and recombinant strains identified using RDP4 (1)  
40 were removed. From these sequence sets, we retained only those sampled in China  
41 and for which there was known information on date and location of sampling. In order  
42 to focus on virus dissemination among poultry, it was first necessary to exclude from  
43 the viral phylogenies those chains of AIV transmission that derive from interspecies  
44 transmission events and which occur in wild bird populations. This was achieved by  
45 reconstructing the movement of AIV lineages between wild birds and domestic  
46 poultry using a range of sampling and analysis strategies. AIV sequences that belong  
47 to phylogenetic clusters that are inferred to represent transmission wholly or  
48 predominately in or from wild birds were removed from the data sets (*SI Appendix,*  
49 *Fig. S7*), which means that poultry AIV sequences found within clades dominated by  
50 wild bird AIV sequences were also excluded. Consequently, only those lineages that  
51 are inferred to be circulating in domestic poultry population were retained for further  
52 analysis.

53

54 In order to ameliorate potential sampling biases, we subsequently randomly  
55 subsampled these datasets in a stratified manner to create a more equitable  
56 spatiotemporal distribution of AIV sequences. Specifically, the H5N1 HA gene  
57 sequences were subsampled to 322 sequences (1704 nt); sequences from  
58 over-sampled years and provinces were removed randomly so that there was at most 8  
59 sequences per year and per province, thereby increasing the evenness of sampling  
60 whilst retaining a wide range of sampling dates and locations (*SI Appendix*, Fig. S11).  
61 In addition, those locations for which there are too few (<4) H5N1 sequences to be  
62 analysed in phylogeographic dynamics were removed. Similarly, HA sequences of  
63 H7N9 and H5N6 viruses were subsampled to 291 sequences (444 sequences for the  
64 full-host dataset of H7N9) and 201 sequences, respectively (*SI Appendix*, Fig. S11).  
65 Accession numbers of all sequences in the final datasets are provided in Dataset *S2*.  
66  
67 Initial maximum likelihood (ML) phylogenies were estimated for each subtype using  
68 FastTree v2.1.4 (2) under a GTR+ $\Gamma$  nucleotide substitution model. These phylogenies  
69 were then used to test for the presence of phylogenetic temporal structure, by  
70 generation of a scatterplot of root-to-tip genetic divergence against date of sampling  
71 using TempEst v1.5 (3). Strong phylogenetic temporal structure was detected in all  
72 datasets (*SI Appendix*, Fig. S12).  
73

74 **Phylogeographic inference.** Time-resolved phylogenies of HA sequences were  
75 estimated using the Markov chain Monte Carlo (MCMC) approach implemented in  
76 BEAST v1.8.2 (4) with the BEAGLE (5) library. We used a uncorrelated lognormal  
77 (UCLN) relaxed molecular clock model (6), the SRD06 nucleotide substitution model  
78 (7) and the Gaussian Markov random field (GMRF) Bayesian Skyride coalescent tree  
79 prior (8). For each dataset, MCMC chains were run in triplicate for 100 million  
80 generations with burn-in of 10%, sampling every 10,000 steps. Convergence of  
81 MCMC chains was checked with Tracer v1.7. A set of 1000 trees was subsampled  
82 from the MCMC chain and used as an empirical tree distribution for the subsequent  
83 analysis.

84

85 Time-measured phylogenies were inferred using the Bayesian discrete  
86 phylogeographic approach (9) implemented in BEAST v1.8.2 (4). We used a  
87 non-reversible discrete-state continuous time Markov chain (CTMC) model and a  
88 Bayesian stochastic search variable selection (BSSVS) approach to infer (i) the most  
89 probable locations of ancestral nodes in the phylogeny and (ii) the history and rates of  
90 lineage movement among locations (9). For each dataset, one MCMC chain was run  
91 for 200 million steps with a burn-in of 10% steps, sampled every 20,000 steps.

92 Similarly, we assessed the convergence of the chains in Tracer v1.7. Using  
93 TreeAnnotator v1.8.2, we subsequently summarized a maximum clade credibility tree  
94 from the posterior set of trees of each dataset. To ensure that the inferred relationships

95 between distance and lineage movement were not a consequence of the prior used, we  
96 repeated the analysis after randomising the locations assigned to each sequence (*SI*  
97 *Appendix*, Fig. S13).

98

99 **Quantifying contributions of potential predictors of AIV dispersal.** To infer  
100 potential explanatory factors that are associated with AIV dispersal among poultry in  
101 different locations, we applied the generalized linear model (GLM) extension of  
102 Bayesian phylogeographic inference (10) to the HA gene datasets of H5N1, H5N6  
103 and H7N9 viruses in China. We used a Bayesian Stochastic Search Variable Selection  
104 (BSSVS) approach with binomial prior probability distributions on the indicator  
105 variables reflecting a 50% prior probability on no predictors being included. We used  
106 Bayes factors (BFs) to quantify the support for the posterior probability of inclusion  
107 of each potential predictive factor.

108

109 The potential predictors used in the model were (i) among-province poultry trade flux,  
110 obtained using from the reconstructed live poultry trade network (outlined above), (ii)  
111 egg trade flux among provinces in the reconstructed egg trade network (outlined  
112 above), (iii) the shortest distance among provinces along the national highway  
113 network (see above), (iv) socio-economic predictors relating to production and  
114 consumption of live poultry and poultry egg (described in *SI Appendix*, Table S4),  
115 specifically, poultry population density, poultry production, poultry consumption and

116 *per capita* consumption, egg production, egg consumption and *per capita*  
117 consumption, and demographic data, (v) absolute latitude and longitude of the capital  
118 city of each province, (vi) number of sequences from each location, and (vii) the  
119 existence of bird migration among provinces. Bird migration flux was ascertained  
120 from a binary network of wild bird migration among provinces, based on GPS  
121 tracking of wild bird migration routes in China from 2006 to 2016, obtained from the  
122 Chinese Academy of Forestry (11). All the data (Dataset S3) were log-transformed  
123 and normalized as the model inputs.

124

125 **Interspecies transmission inference.** The host transmission between wild avian hosts  
126 and domestic poultry hosts throughout the viral evolutionary history was inferred  
127 using a Bayesian discrete phylogeographic approach (9) implemented in BEAST  
128 v1.8.2 (4). We implemented a non-reversible discrete-state continuous time Markov  
129 chain (CTMC) model and a Bayesian stochastic search variable selection (BSSVS)  
130 approach to infer the most probable ancestral host of the phylogeny and the most  
131 parsimonious description of the phylogeography dynamics (9). MCMC chains were  
132 run for 200 million steps with a burn-in of 10% steps, and sampled every 20,000 steps.  
133 The maximum clade credibility tree was summarized by TreeAnnotator v1.8.2. Three  
134 datasets with different sampling strategies are used in the inference. The host species  
135 of each AIV gene sequence is defined according to the United States Geological

136 Survey (USGS) (12) and by information in the original references. All three trees  
137 have a backbone of domestic poultry states (Supplementary Fig. 5).

138

139 **Sampling strategies.** *Dataset 1:* 175 sequences of domestic poultry and 142  
140 sequences of wild birds. We subsampled the HA gene segments of H5N1 viruses from  
141 domestic poultry to 175 sequences (1704 nt), at most 2 sequences per year and per  
142 province so that the amount of sequences of domestic poultry is nearly equal to that of  
143 wild birds (142 sequences). Sequences of wild birds are retained as 142 sequences  
144 without down-sampling.

145

146 *Dataset 2:* 353 sequences of domestic poultry and 142 of wild birds. We subsampled  
147 the HA gene segments of H5N1 viruses from domestic poultry to 353 sequences  
148 (1704 nt), at most 8 sequences per year and per province. Sequences of wild birds are  
149 retained as 142 sequences without down-sampling.

150

151 *Dataset 3:* 285 HA sequences of H5N1 of domestic poultry and 84 of wild birds.  
152 Sequences of domestic poultry and wild birds are together randomly subsampled to 5  
153 sequences per year, per host type, per location.

154

155 **Poultry transportation network reconstruction.** Provincial-level networks of  
156 poultry transportation (Fig. 3, *SI Appendix*, Fig. S6) were constructed from statistics

157 of poultry egg production and populations of domestic poultry, using a classic gravity  
158 model. This model is supported by cross-sectional surveys of poultry transportation in  
159 Cambodia (13) and Vietnam (14). In summary, the flux of live poultry or poultry egg  
160 transport ( $G_{ij}$ ) between provinces  $i$  and  $j$  separated by geographic distance  $d_{ij}$  takes the  
161 form  $G_{ij} = N_i N_j d_{ij}^{-1}$ , where  $N_i$  is the amount of live poultry (unit: 10,000 poultry) or  
162 poultry egg production (unit: ton) in source province  $i$  (averaged across years).  $N_j$  is  
163 human population size (unit: 10,000 people) in destination province  $j$  (averaged across  
164 years). Both  $N_i$  and  $N_j$  were obtained from statistical yearbooks and databases (*SI*  
165 *Appendix*, Table S4);  $d_{ij}$  is the shortest distance (unit: kilometre) between provinces in  
166 the national highway network, calculated by the Origin-Destination Cost Matrix  
167 algorithm in ArcGIS v10.2 (ESRI, Redlands, CA, USA). This distance was chosen  
168 because inter-provincial live poultry transportation in China mainly occurs via  
169 national highways; live poultry transportation on freeways is limited due to high tolls,  
170 and on railways due to regulations (15, 16). Additionally, other gravity-model  
171 parameterisations were tested and the results showed that the network structure we  
172 infer is robust to the parameterisation.

173

174 **Parameter estimation of gravity model.** A model with an exponential distance  
175 decay function and parameters fit to a dataset from Cambodia (13, 17) was calculated  
176 as a contrast to the live poultry trade network. The framework is as follows:

177 
$$G_{ij} = \theta N_i^\epsilon N_j^\beta f(d_{ij})$$



178

$$f(d_{ij}) = e^{-\frac{d_{ij}}{\lambda}} / \lambda^2$$

179

where  $\lambda = 167.456$ ,  $\varepsilon = 0.543$ , and  $\beta = 0.934$  are fitted parameters with data from a

180

cross-sectional survey on live poultry traders in Cambodia, and  $\theta$  is a scaling

181

parameter equalling 1. The correlation coefficient between trade flows estimated from

182

this model and from the model with classic parameters is 0.698.

183

184 **Hidden viral transmission path detection.** To describe the process of virus

185 transmission across all provinces, including those for which no AIV sequence data

186 was present in our data sets, we used a previously-published gene flow network model

187 (GFN) (18) to infer an empirically-derived weighted network of AIV dispersal (*SI*

188 *Appendix*, Fig. S5). The GFN model is based on the observation that the pairwise

189 genetic distance between a pair of AIV sequences from two different locations is

190 strongly correlated with the duration of the transmission history between the two

191 infections, which itself is a consequence of the path taken by that history through a

192 given network of locations, whose connections are weighted by some measure (e.g.

193 distance, or trade). A summary of the steps of the GFN model approach follows here.

194 (i) To begin we construct a fully-adjacent network, whose nodes are the geographic

195 locations/provinces (regardless of whether AIV sequences are available for that

196 location) and whose edges represent the minimum distance along national highways

197 between adjacent locations (edges between non-adjacent locations are not excluded).

198 (ii) A hypothesised path through this fully-adjacent network is then proposed. The

199 path must pass through all locations for which virus sequences are available in a  
200 sequential random order; in doing so, the path may pass through locations without  
201 virus sampling and may visit the same node more than once. The shortest path  
202 meeting these conditions was identified using the Floyd-Warshell Algorithm (19). (iii)  
203 A pair of sequences from two locations is chosen. (iv) The spatial distance along the  
204 hypothesised path between the locations defined by these two sequences is then  
205 calculated. This is simply the sum of the edges in the fully-adjacent network as the  
206 path moves through it. (v) Steps (ii)-(iv) are then repeated for all pairs of sequences.  
207 The correlation between the genetic distance and path spatial distance for each pair of  
208 sequences is then computed. (vi) Steps (ii) to (v) are then repeated 10,000 times,  
209 resulting in a distribution of correlation coefficient values. (vi) The top 10% of these  
210 replicates with the highest correlation coefficients are identified. (vii) The  
211 hypothesised paths that correspond to the top 1000 paths are then summarised into the  
212 final gene flow network (GFN). This is done by simply counting the frequency with  
213 which each edge in the fully-adjacent network is represented in the set of 1000 paths.  
214 These frequencies then reflect the likelihood of virus movement among all locations,  
215 including via locations for which no sequences were sampled.

216

217 **Community structure detection.** Identifying community structures (20) is a crucial  
218 step in investigating networks that might explain patterns of viral spatial  
219 dissemination. In this context, a “community” is a group of nodes in a network such

220 that intra-group connections are stronger or more numerous than inter-group  
221 connections (21, 22); the degree to which a network is subdivided into communities is  
222 measured as “modularity” (22). Using the Walktrap community finding algorithm  
223 (23), with random walk length  $t = 5$ , we identified the community structure of (i) the  
224 live poultry trade networks, (ii) the poultry egg trade network. Although each of these  
225 networks are directed, edge directions were ignored in order to focus on vertex  
226 connections. The connection strength of two vertices was defined as the sum of the  
227 weights of all edges between those vertices; this approach has proven suitable for  
228 modularity-based community detection algorithms (20, 22).

229

230 To set the random walk length  $t$  to a suitable value, we experimented the community  
231 structure detection with  $t$  from 1 to 100. We observed that small values like  $t=1, 2, 3,$   
232  $4, 5$  generated community structures with much higher modularity, which is  
233 consistent with the previous study (24). When  $t=2$ , the modularity value is highest,  
234 whereas locations are merged into only two large communities, which probably  
235 results from the resolution limit of modularity optimization (25). To sufficiently  
236 capture the local community structure and avoid over optimization of modularity as  
237 well, we set the random walk length  $t$  to 5.

238

239 To test the robustness of the detected community structures, we introduced the  
240 random perturbation as Gaussian noise (mean=0, standard deviation=10% of the mean

241 edge weights) into the live poultry network. On the perturbed networks, we conducted  
242 the community structure detection by Walktrap community finding algorithm, with  
243 random walk length  $t=5$ . To quantify differences in community structure of the  
244 perturbed network and that of the original network, we used four representative  
245 methods including the Rand index (26), van Dongen metric (27), normalized mutual  
246 information (28) and variation of information (29). The results (Dataset S1) show that  
247 the detected community structures are stable.

248

## 249 **References**

- 250 1. D. P. Martin, B. Murrell, M. Golden, A. Khoosal, B. Muhire, RDP4: Detection  
251 and analysis of recombination patterns in virus genomes. *Virus Evol* **1**, vev003  
252 (2015).
- 253 2. M. N. Price, P. S. Dehal, A. P. Arkin, FastTree: computing large minimum  
254 evolution trees with profiles instead of a distance matrix. *Mol Biol Evol* **26**,  
255 1641-1650 (2009).
- 256 3. A. Rambaut, T. T. Lam, L. M. Carvalho, O. G. Pybus, Exploring the temporal  
257 structure of heterochronous sequences using TempEst (formerly Path-O-Gen).  
258 *Virus Evol* **2**, vew007 (2016).
- 259 4. A. J. Drummond, M. A. Suchard, D. Xie, A. Rambaut, Bayesian phylogenetics  
260 with BEAUti and the BEAST 1.7. *Mol Biol Evol* **29**, 1969-1973 (2012).
- 261 5. D. L. Ayres *et al.*, BEAGLE: an application programming interface and  
262 high-performance computing library for statistical phylogenetics. *Syst Biol*,  
263 syr100 (2011).
- 264 6. A. J. Drummond, S. Y. Ho, M. J. Phillips, A. Rambaut, Relaxed phylogenetics  
265 and dating with confidence. *PLoS Biol* **4**, e88 (2006).
- 266 7. B. Shapiro, A. Rambaut, A. J. Drummond, Choosing Appropriate Substitution  
267 Models for the Phylogenetic Analysis of Protein-Coding Sequences. *Mol Biol*  
268 *Evol* **23**, 7-9 (2005).
- 269 8. V. N. Minin, E. W. Bloomquist, M. A. Suchard, Smooth skyride through a  
270 rough skyline: Bayesian coalescent-based inference of population dynamics.  
271 *Mol Biol Evol* **25**, 1459-1471 (2008).
- 272 9. P. Lemey, A. Rambaut, A. J. Drummond, M. A. Suchard, Bayesian  
273 phylogeography finds its roots. *PLoS Comput Biol* **5**, e1000520 (2009).

- 274 10. P. Lemey *et al.*, Unifying viral genetics and human transportation data to  
 275 predict the global transmission dynamics of human influenza H3N2. *PLoS*  
 276 *Pathog* **10**, e1003932 (2014).
- 277 11. S. Li *et al.*, Migratory Whooper Swans *Cygnus cygnus* Transmit H5N1 Virus  
 278 between China and Mongolia: Combination Evidence from Satellite Tracking  
 279 and Phylogenetics Analysis. *Sci Rep* 10.1038/s41598-018-25291-1 (2018).
- 280 12. United States Geological Survey, List of Species Affected by H5N1 (Avian  
 281 Influenza). United States Geological Survey. Available at  
 282 [https://www.nwhc.usgs.gov/disease\\_information/avian\\_influenza/affected\\_spe-](https://www.nwhc.usgs.gov/disease_information/avian_influenza/affected_species_chart.jsp)  
 283 [cies\\_chart.jsp](https://www.nwhc.usgs.gov/disease_information/avian_influenza/affected_species_chart.jsp). Deposited 2011.
- 284 13. M. D. Van Kerkhove, H5N1/highly pathogenic avian influenza in Cambodia :  
 285 evaluating poultry movement and the extent of interaction between poultry  
 286 and humans. PhD thesis, London School of Hygiene & Tropical Medicine.  
 287 <http://dx.doi.org/10.17037/PUBS.00682389> (2009).
- 288 14. G. Fournié *et al.*, Investigating poultry trade patterns to guide avian influenza  
 289 surveillance and control: a case study in Vietnam. *Sci Rep* **6**, 29463 (2016).
- 290 15. K. Bingsheng, H. Yijun, "Poultry sector in China: structural changes during  
 291 the past decade and future trends" in Poultry in the 21st Century: avian  
 292 influenza and beyond. Proceedings of the International Poultry Conference,  
 293 held 5–7 November 2007, Bangkok, Thailand., O. Thieme, D. Pilling, Eds.  
 294 (FAO, Rome, 2008), pp. 85-117.
- 295 16. L. Fang *et al.*, Environmental factors contributing to the spread of H5N1 avian  
 296 influenza in mainland China. *PLoS One* **3**, e2268 (2008).
- 297 17. M. D. Van Kerkhove, "Poultry Movement and Sustained HPAI Risk in  
 298 Cambodia" in Health and animal agriculture in developing countries, D.  
 299 Zilberman, J. Otte, D. Roland-Holst, D. Pfeiffer, Eds. (Springer, 2011),  
 300 <https://doi.org/10.1007/978-1-4419-7077-0>, pp. 233-263.
- 301 18. H. Tian *et al.*, Avian influenza H5N1 viral and bird migration networks in  
 302 Asia. *Proc Natl Acad Sci USA*, doi: 10.1073/pnas.1405216112 (2014).
- 303 19. R. W. Floyd, Algorithm 97: shortest path. *Commun ACM* **5**, 345 (1962).
- 304 20. M. Girvan, M. E. Newman, Community structure in social and biological  
 305 networks. *Proc Natl Acad Sci USA* **99**, 7821-7826 (2002).
- 306 21. F. Radicchi, C. Castellano, F. Cecconi, V. Loreto, D. Parisi, Defining and  
 307 identifying communities in networks. *Proc Natl Acad Sci USA* **101**, 2658-2663  
 308 (2004).
- 309 22. M. E. Newman, M. Girvan, Finding and evaluating community structure in  
 310 networks. *Phys Rev E* **69**, 026113 (2004).
- 311 23. P. Pons, M. Latapy, Computing communities in large networks using random  
 312 walks. *J. Graph Algorithms Appl.* **10**, 191-218 (2006).
- 313 24. D. Lai, H. Lu, C. Nardini, Enhanced modularity-based community detection  
 314 by random walk network preprocessing. *Phys Rev E* **81**, 066118 (2010).

- 315 25. S. Fortunato, M. Barthélemy, Resolution limit in community detection. *Proc*  
316 *Natl Acad Sci USA* **104**, 36-41 (2007).
- 317 26. L. Hubert, P. Arabie, Comparing partitions. *J Classif* **2**, 193-218 (1985).
- 318 27. S. van Dongen, Performance criteria for graph clustering and Markov cluster  
319 experiments. Technical Report INS-R0012, National Research Institute for  
320 Mathematics and Computer Science in the Netherlands, Amsterdam (2000).
- 321 28. D. Leon, D.-G. Albert, D. Jordi, A. Alex, Comparing community structure  
322 identification. *J Stat Mech* **2005**, P09008 (2005).
- 323 29. M. Meilă, Comparing clusterings—an information based distance. *J Multivar*  
324 *Anal* **98**, 873-895 (2007).
- 325

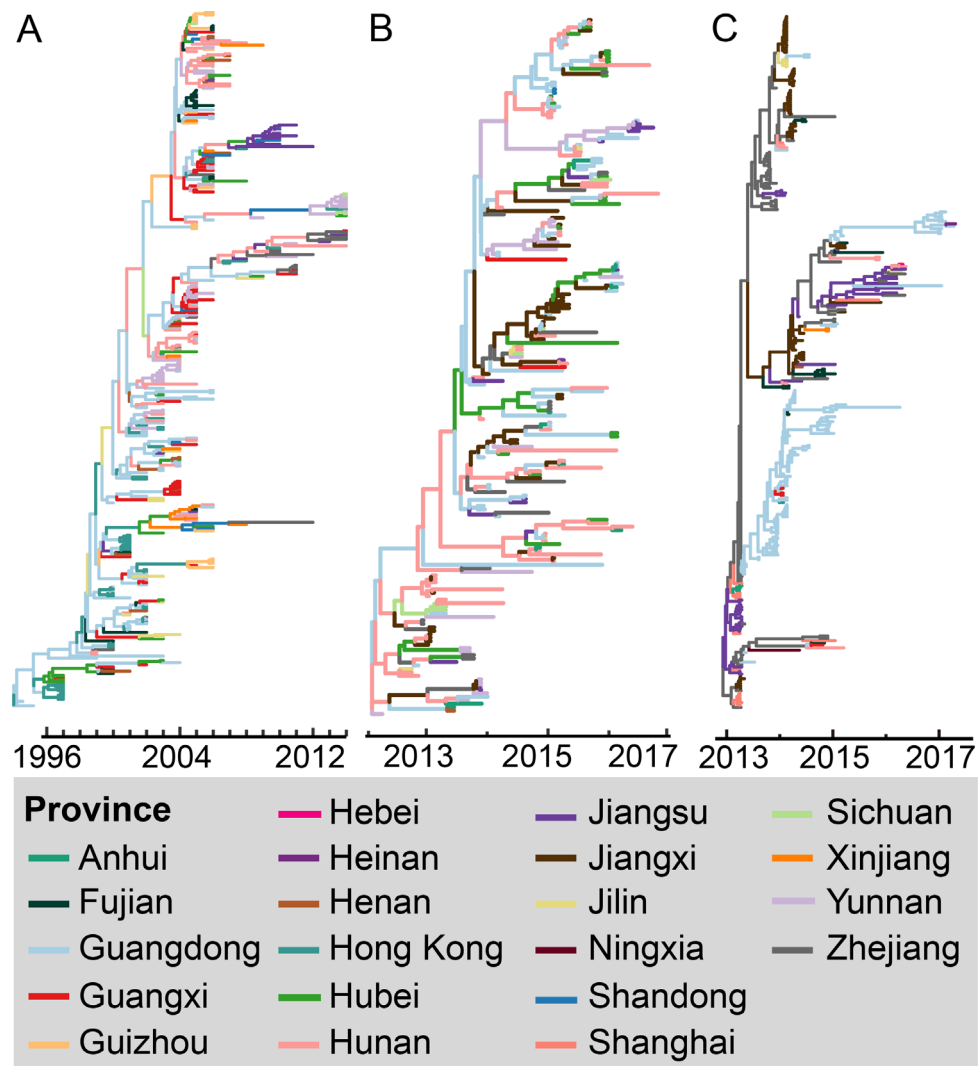

326

327 **Fig. S1. The maximum clade credibility (MCC) phylogeny of the HA gene of**  
 328 **H5N1 (A), H5N6 (B) and H7N9 (C) viruses in poultry in China.** The phylogeny is  
 329 inferred by Bayesian phylogeography inference methods. Branches are coloured  
 330 according to the most probable location state of their descendent nodes.

331

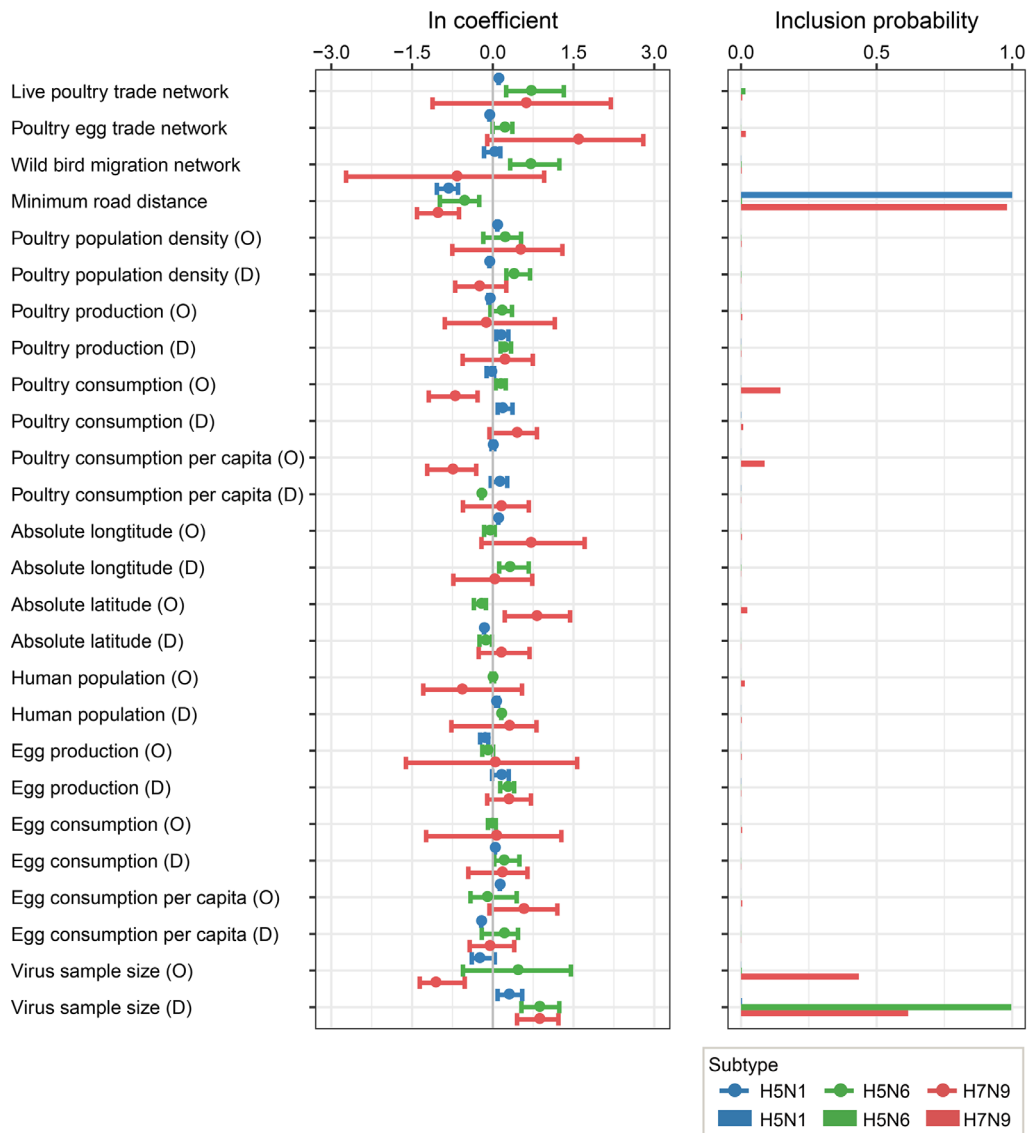

332

333 **Fig. S2. Contributions of all predictor variables to the dissemination of H5N1,**  
 334 **H5N6 and H7N9 lineages in China among poultry, inferred from analysis of HA**  
 335 **gene sequences. HP AIV subtypes H5N1, H5N6 and H7N9 are coloured blue, green**  
 336 **and red, respectively. Predictors labelled (O) and (D) represent the origin and**  
 337 **destination, respectively. In the left-hand plots, the estimated coefficients of**  
 338 **predictors are represented as circles (>0 = positive association, <0 = negative**  
 339 **association). Error bars represent the 95% highest posterior density (HPD) credible**  
 340 **interval for these estimates. The bars in the right-hand plots show the posterior**  
 341 **probability of inclusion of each predictor.**

342



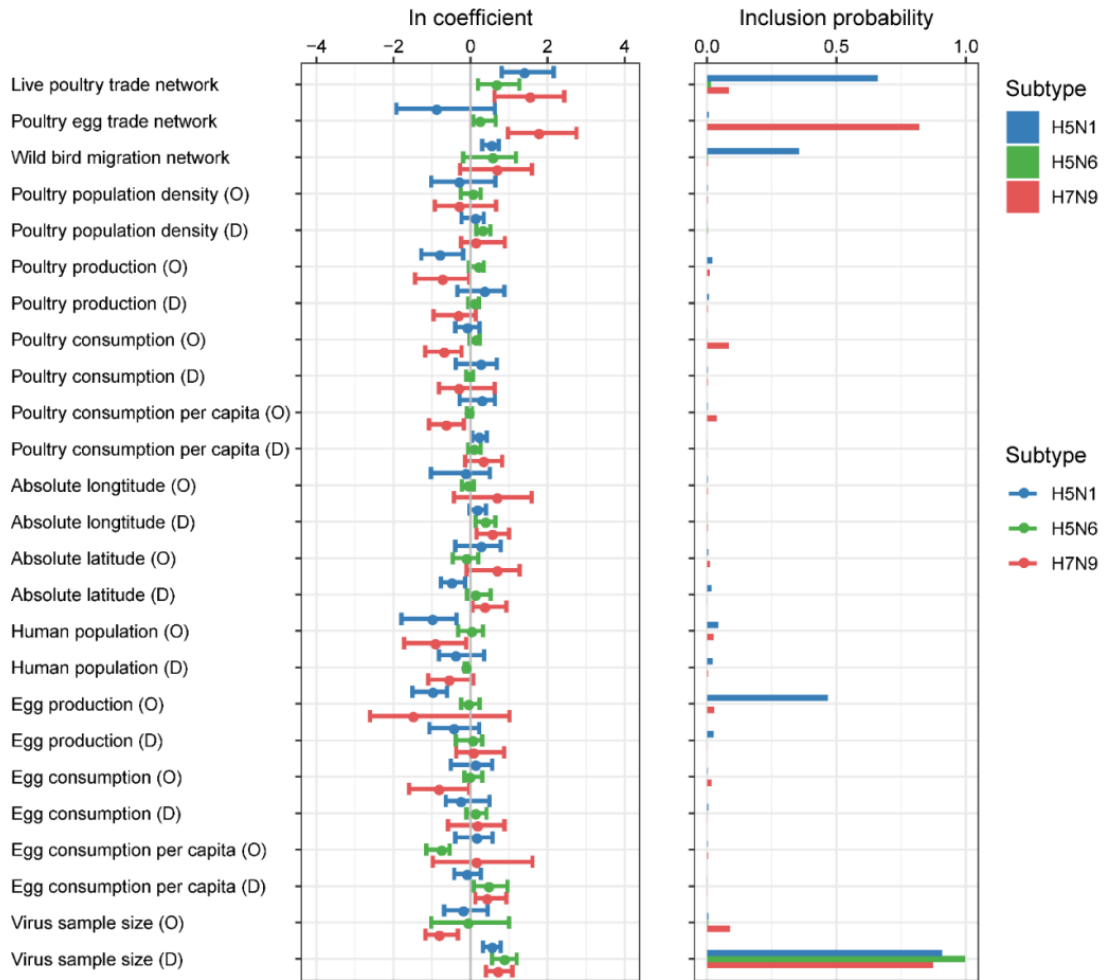

343

344

345 **Fig. S3. Contributions of predictor variables to the dissemination of H5N1, H5N6**  
 346 **and H7N9 lineages among poultry in China, inferred from analysis of HA gene**  
 347 **sequences, without minimum road network distance.** Results when the minimum  
 348 minimum road network distance predictor is excluded from the analysis. Due to the high  
 349 similarity of poultry trade and egg trade ( $R=0.95$ ,  $P<0.01$ ), we do not further  
 350 differentiate between those two predictors.

351

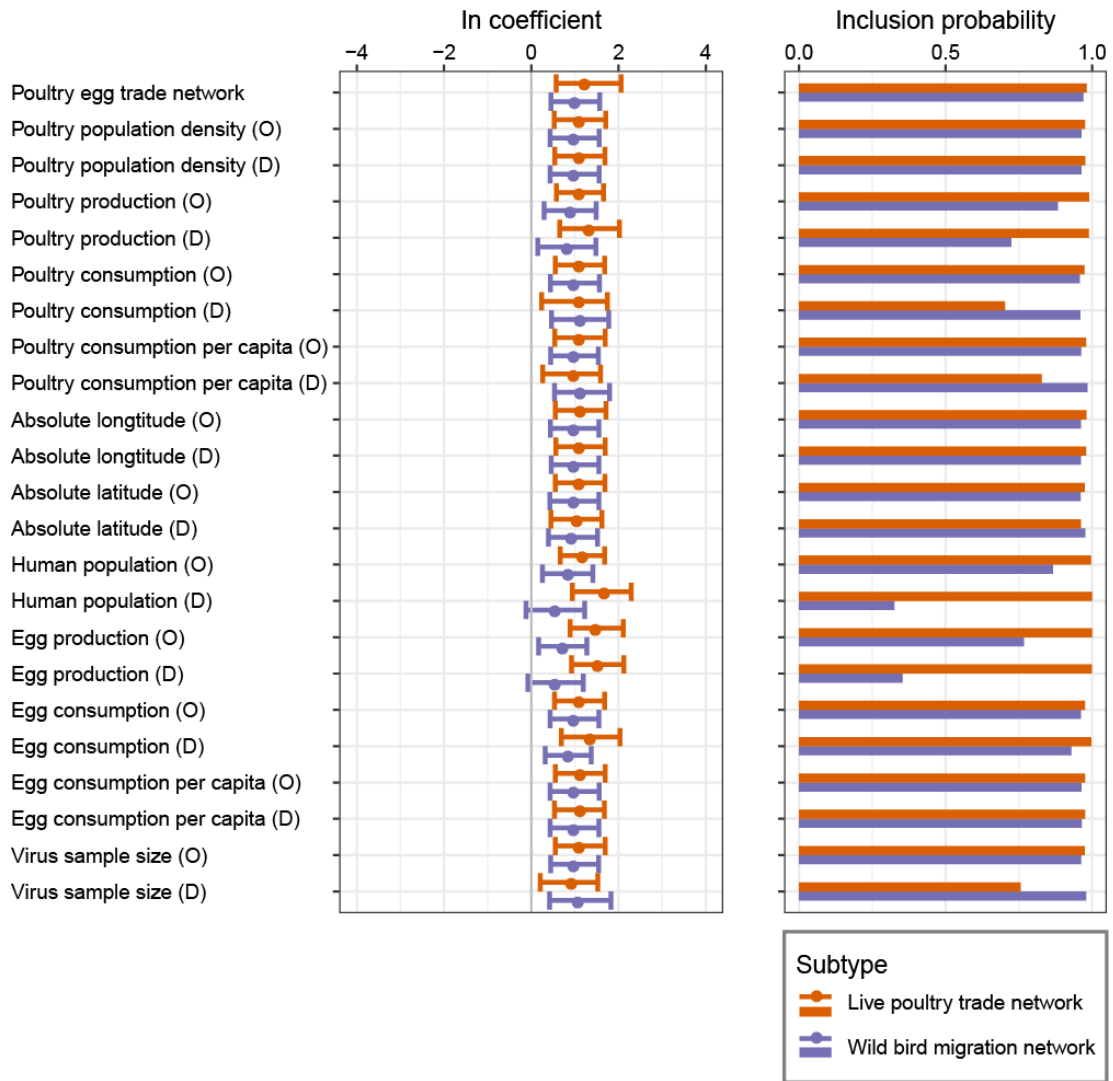

352

353 **Fig. S4a. Sensitivity analysis, H5N1 AIV.** Results show the effect of the inclusion of  
 354 the third predictor on the estimates of wild bird migration and live poultry trade  
 355 network.

356

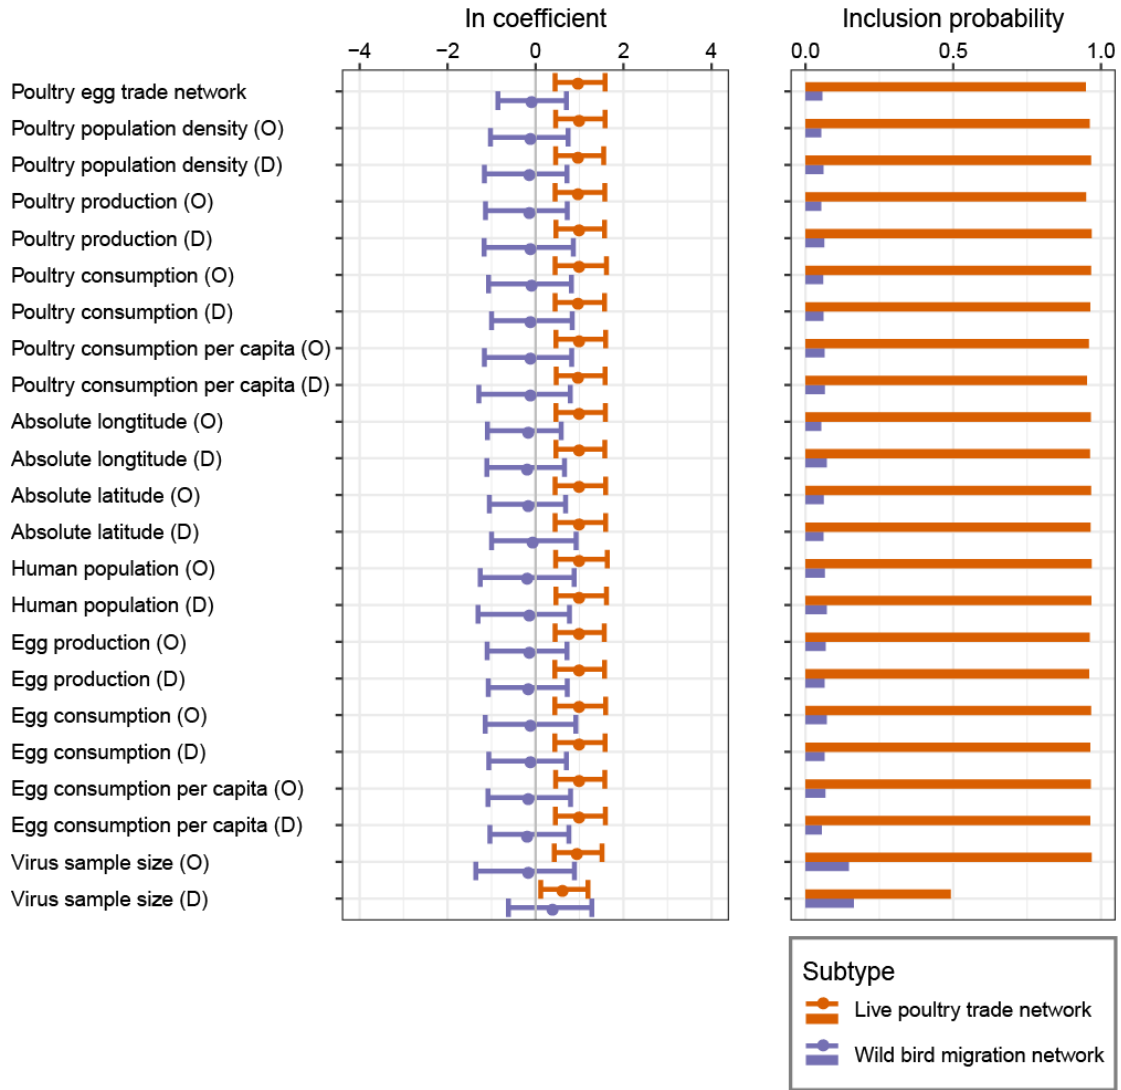

357

358 **Fig. S4b. Sensitivity analysis, H5N6 AIV.** Results show the effect of the inclusion of  
 359 the third predictor on the estimates of wild bird migration and live poultry trade  
 360 network.

361

362

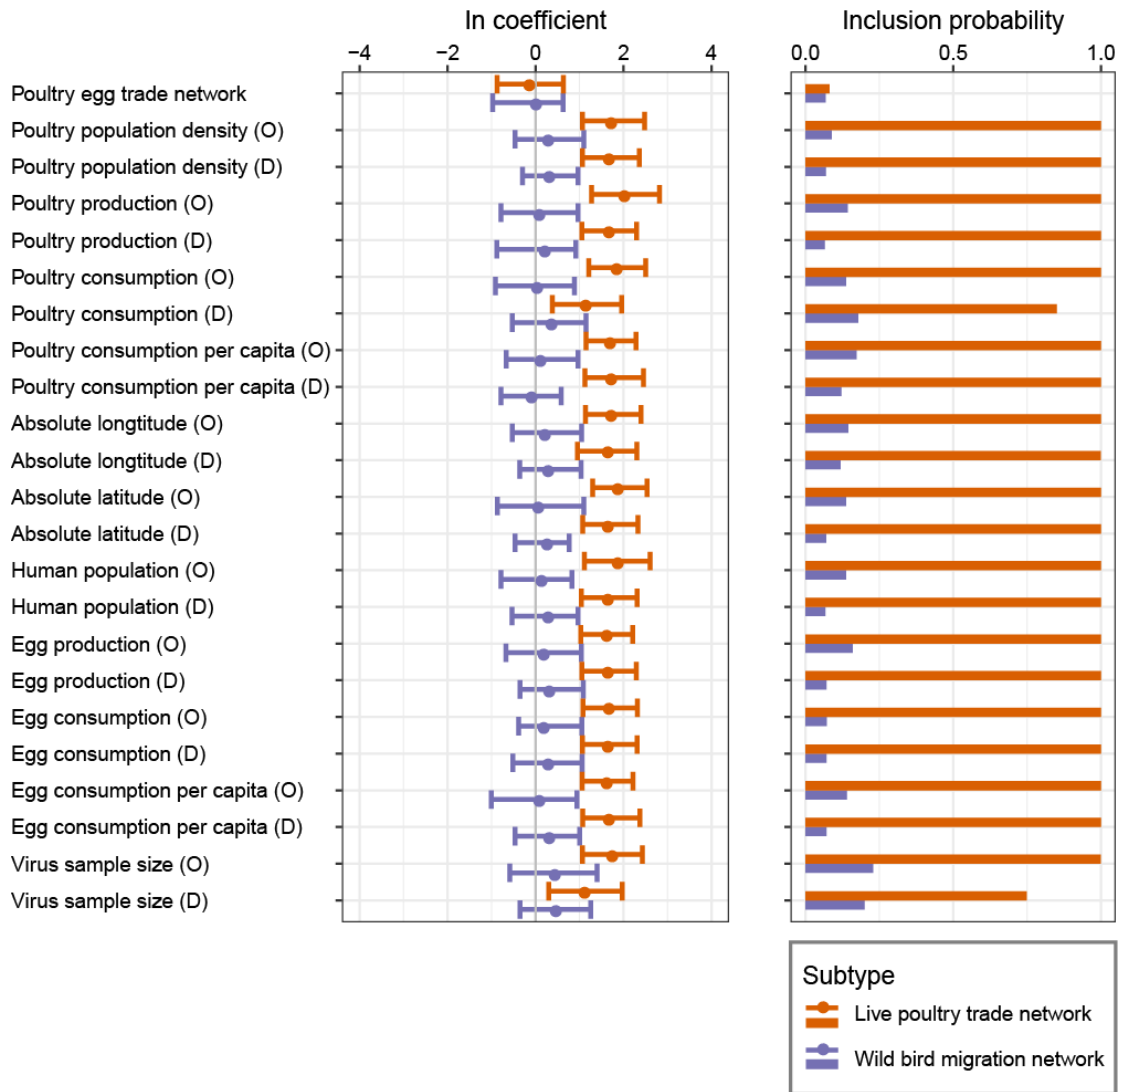

363

364 **Fig. S4c. Sensitivity analysis, H7N9 AIV.** Results show the effect of the inclusion of  
 365 the third predictor on the estimates of wild bird migration and live poultry trade  
 366 network. Due to the high similarity of poultry trade and egg trade ( $R=0.95$ ,  $P<0.01$ ),  
 367 we do not further differentiate between those two predictors.

368

369

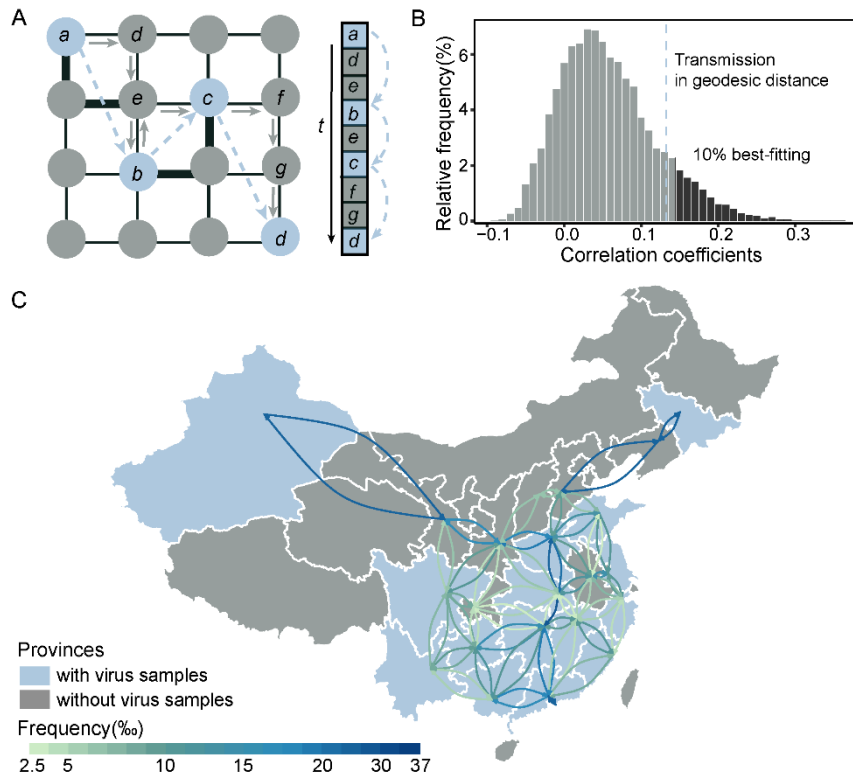

370

371 **Fig. S5. The gene flow network model.** (A) Method of finding the virus transmission  
 372 path (grey arrow-headed solid lines) in time order (t): a->d->e->b->e->c->f->g->d  
 373 that is hidden in the full adjacent network under the observed path (blue arrow-headed  
 374 dotted lines): a->b->c->d. Blue nodes indicate locations from which virus sequences  
 375 are available; grey indicates locations without virus sampling. Black solid lines  
 376 between nodes represent edges between adjacent locations in the full adjacent  
 377 network. Line widths represent edge weights that are used to find the shortest path by  
 378 Floyd-Warshell algorithm. (B) Histogram of the correlation coefficients of the path  
 379 distances through the network and the gene flow network of sequences. Bars represent  
 380 the correlation coefficients generated by 10,000 hypothesised transmission paths and  
 381 genetic distances, 1000 best-fittings were highlighted in black. The blue dotted line  
 382 indicates the strength of the correlation obtained if the distance used is simply the  
 383 geodesic distance between pairs of provinces. (C) Gene flow network. Frequency of  
 384 migration events between pairs of provinces in 1000 top-selected randomly generated  
 385 transmission paths. Green and dark blue curves represent low and high frequencies,  
 386 respectively. Blue indicates provinces from which virus sequences are available; grey  
 387 indicates provinces without virus sampling.

388

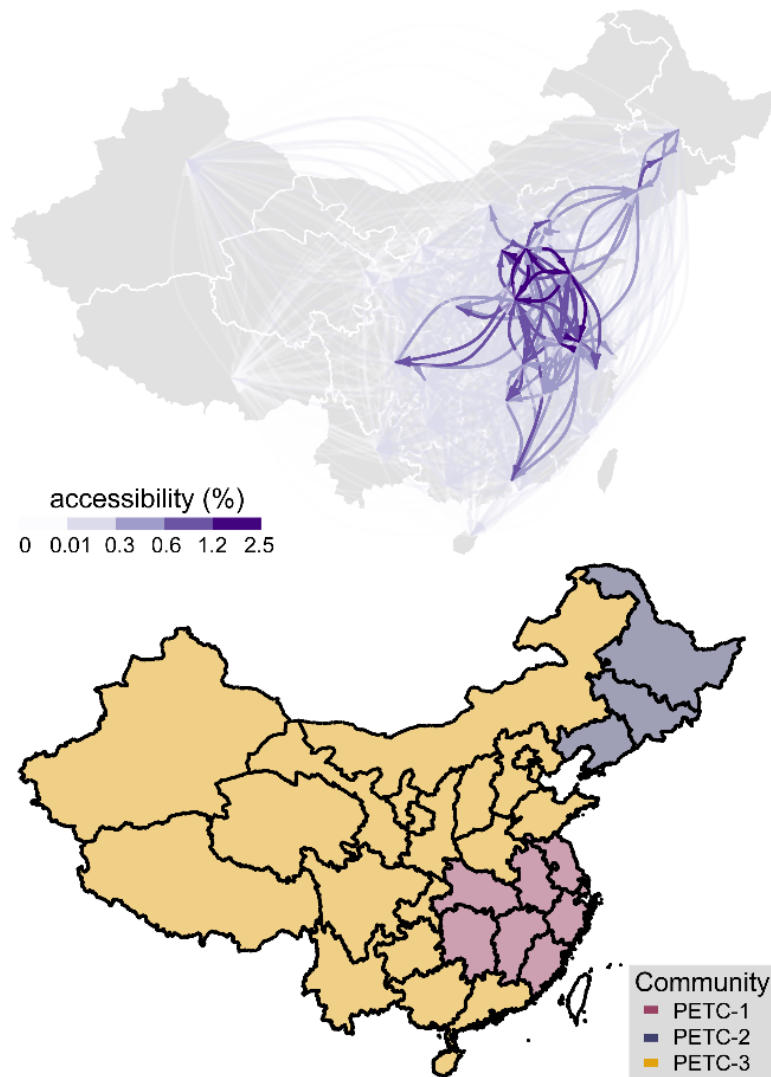

389

390 **Fig. S6. Poultry egg trade network and community structure.** Upper panel:  
 391 Accessibility of poultry egg trade flows between pairs of provinces. Colours of light  
 392 purple and dark purple represent low and high accessibility respectively. Lower panel:  
 393 poultry egg trade communities 1, 2, 3 (coloured pink, purple, and yellow, respectively)  
 394 are clustered in the Yangtze River Delta region, north-eastern China and other regions.

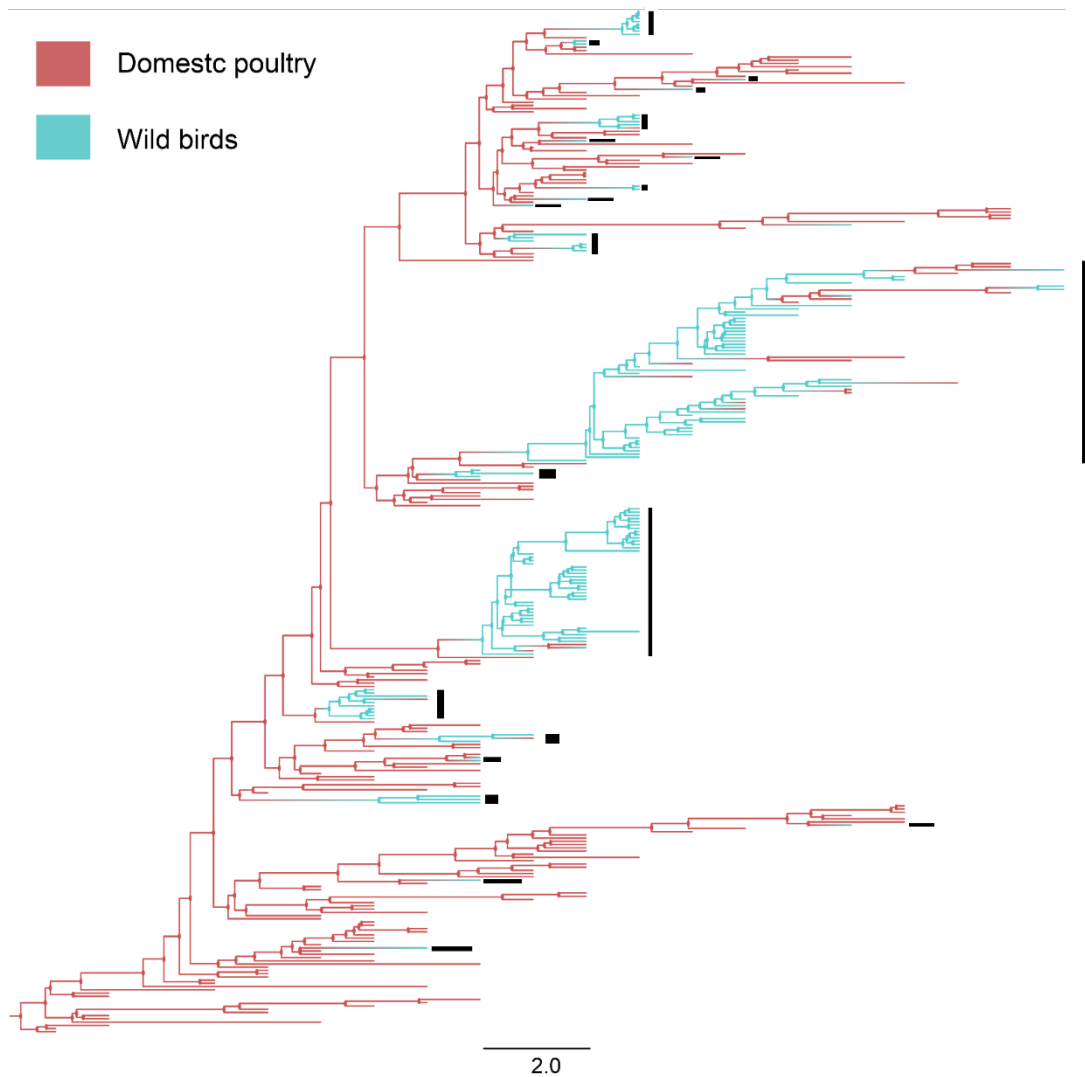

395

396 **Fig. S7a. The maximum clade credibility (MCC) phylogeny of the HA gene of**  
 397 **H5N1 viruses in wild birds and domestic poultry in China inferred by Bayesian**  
 398 **discrete phylogeographic approach.** Light blue and light red represent the host type  
 399 of wild birds and domestic poultry, respectively. The phylogeny is inferred on *Dataset*  
 400 *1* (sequences of domestic poultry: 175 and those of wild birds: 142). The sequences  
 401 indicated by a black rectangle are in the wild bird lineage that would be removed in  
 402 subsequent analysis.

403

404

405

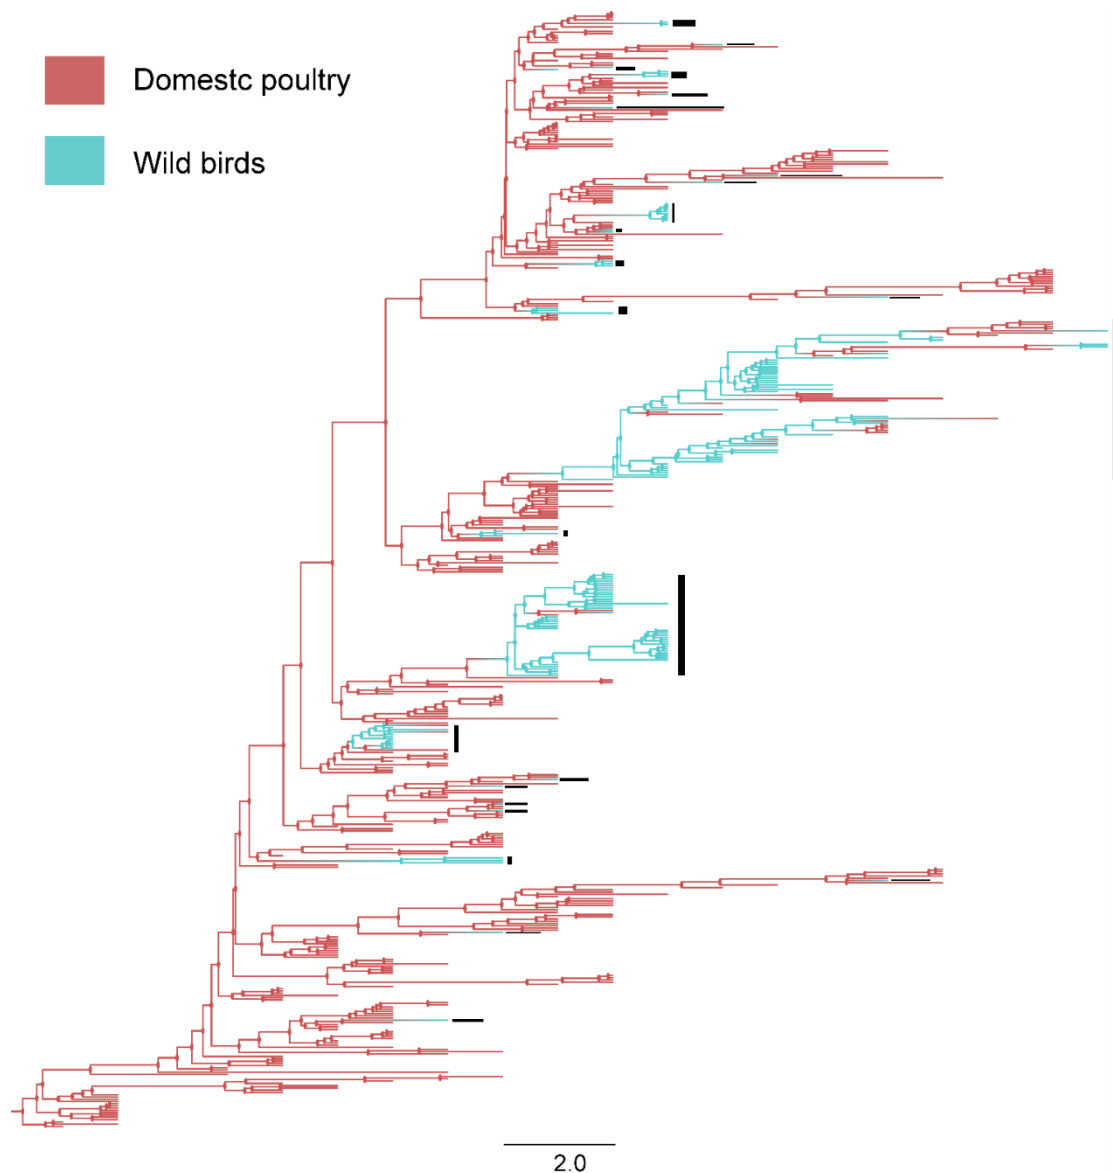

406

407 **Fig. S7b. The maximum clade credibility (MCC) phylogeny of the HA gene of**  
 408 **H5N1 viruses in wild birds and domestic poultry in China inferred by Bayesian**  
 409 **discrete phylogeographic approach.** Light blue and light red represent the host type  
 410 of wild birds and domestic poultry, respectively. The phylogeny is inferred on Dataset  
 411 2 (sequences of domestic poultry: 353 and those of wild birds: 142). The sequences  
 412 indicated by a black rectangle are in the wild bird lineage that would be removed in  
 413 subsequent analysis.

414

415



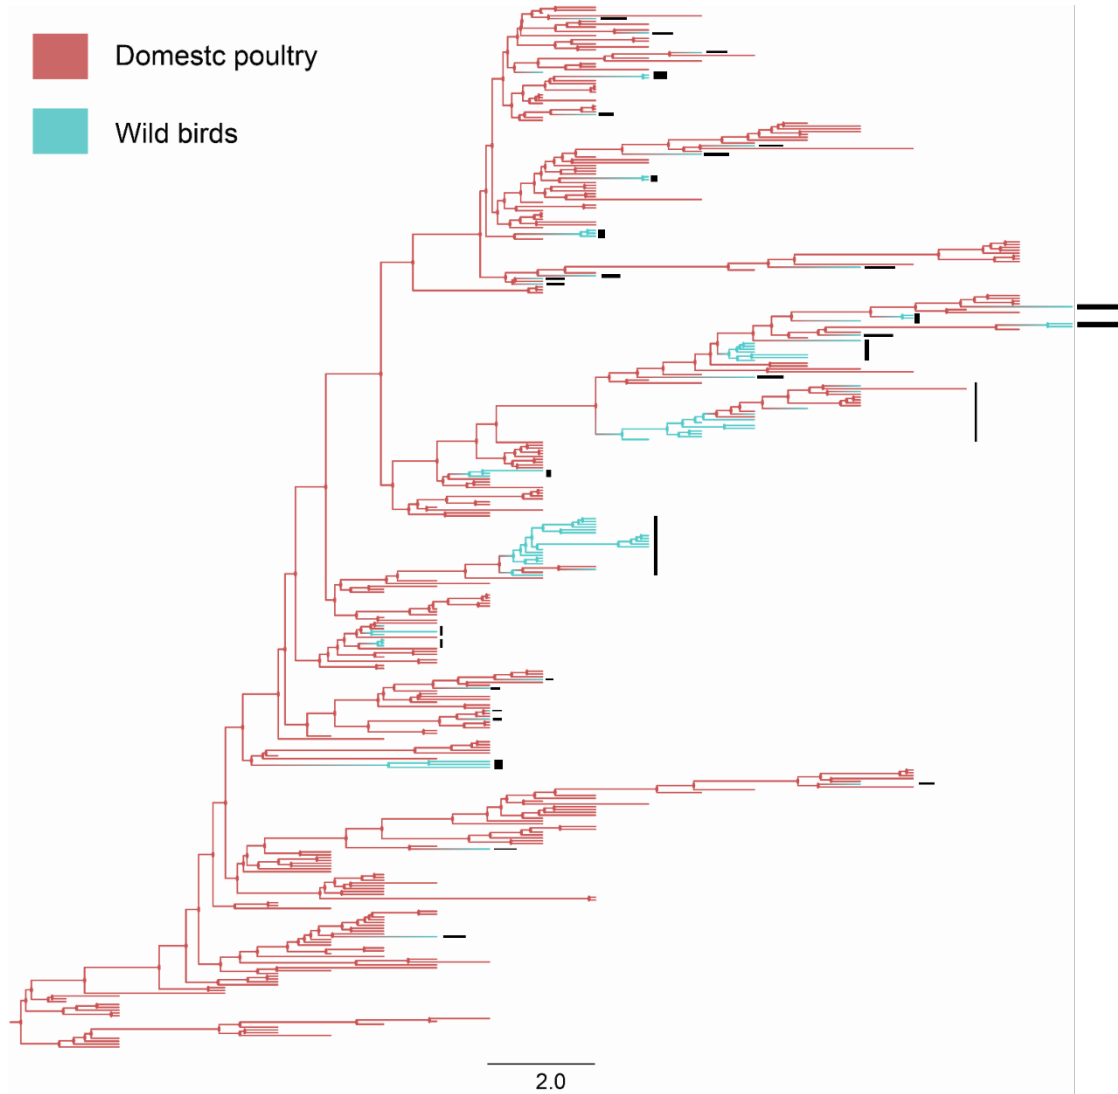

416

417 **Fig. S7c. The maximum clade credibility (MCC) phylogeny of the HA gene of**  
 418 **H5N1 viruses in wild birds and domestic poultry in China inferred by Bayesian**  
 419 **discrete phylogeographic approach.** Light blue and light red represent the host type  
 420 of wild birds and domestic poultry, respectively. The phylogeny is inferred on Dataset  
 421 3 (sequences of domestic poultry: 285 and those of wild birds: 84). The sequences  
 422 indicated by a black rectangle are in the wild bird lineage that would be removed in  
 423 subsequent analysis.

424

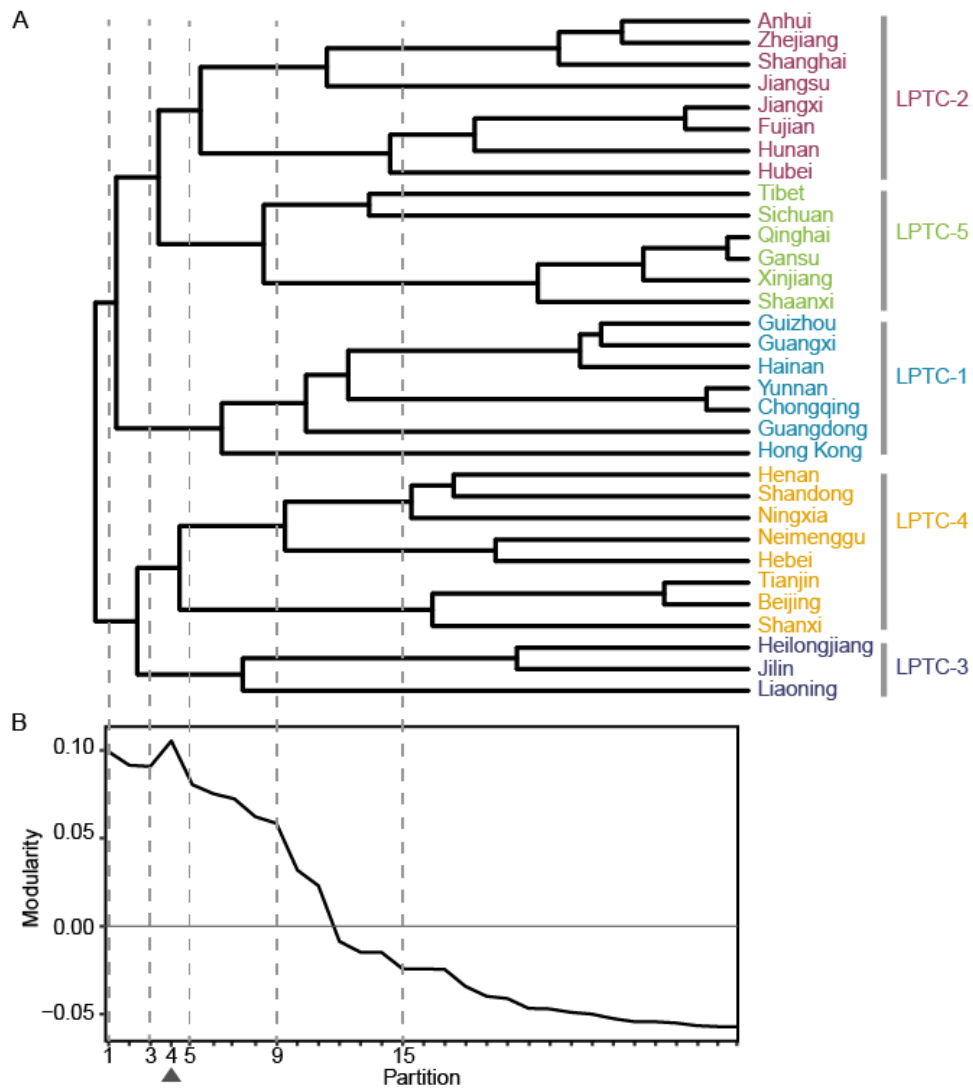

425

426 **Fig. S8. Community detection at different scales.** (A) Multi-scale partitions of the  
 427 live poultry trade network found by Walktrap algorithm, and (B) the corresponding  
 428 modularity value at various resolution levels. The triangle indicates the live poultry  
 429 trade communities (Partition 4) used in the main text. Four community structures at  
 430 different scales (dotted lines) were selected for comparison. Positive value of the  
 431 modularity indicates the possible presence of community structure.  
 432

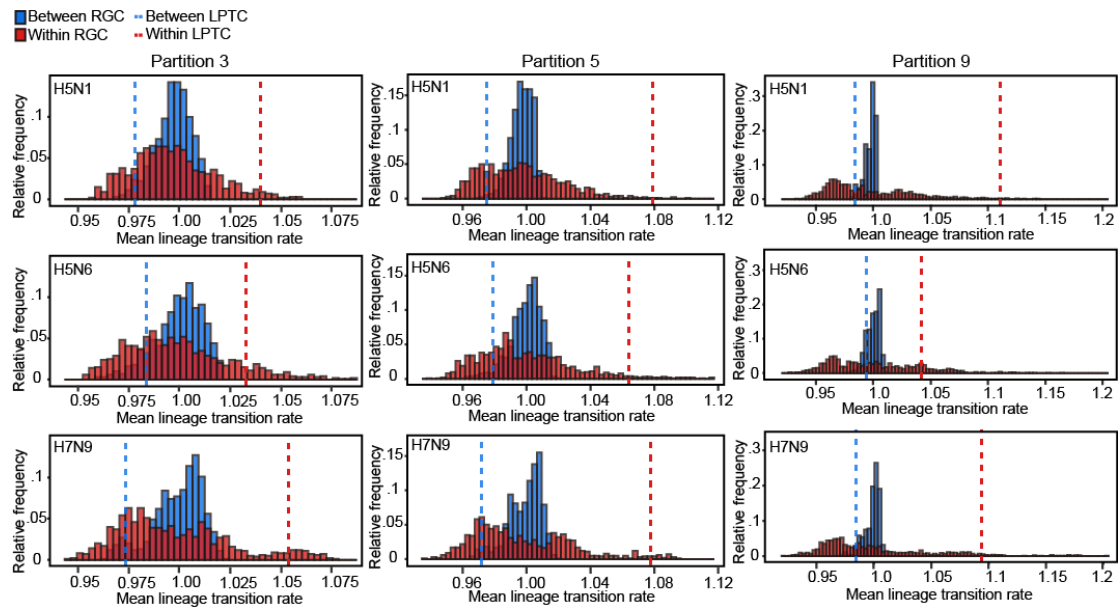

433

434 **Fig. S9. Histograms of mean among-location AIV lineage transition rates**  
 435 **(Partition 3, 5, and 9).** The raw transition rates between locations are obtained from  
 436 the analyses reported in Fig. 1. Two means are shown here: blue = mean transition  
 437 rate for pairs of locations in different live poultry trade communities (LPTCs); red =  
 438 mean transition rate for pairs of locations in the same LPTC. Dotted vertical lines  
 439 show these two means calculated using the partition of the empirically-derived (“true”)  
 440 LPTC network.

441

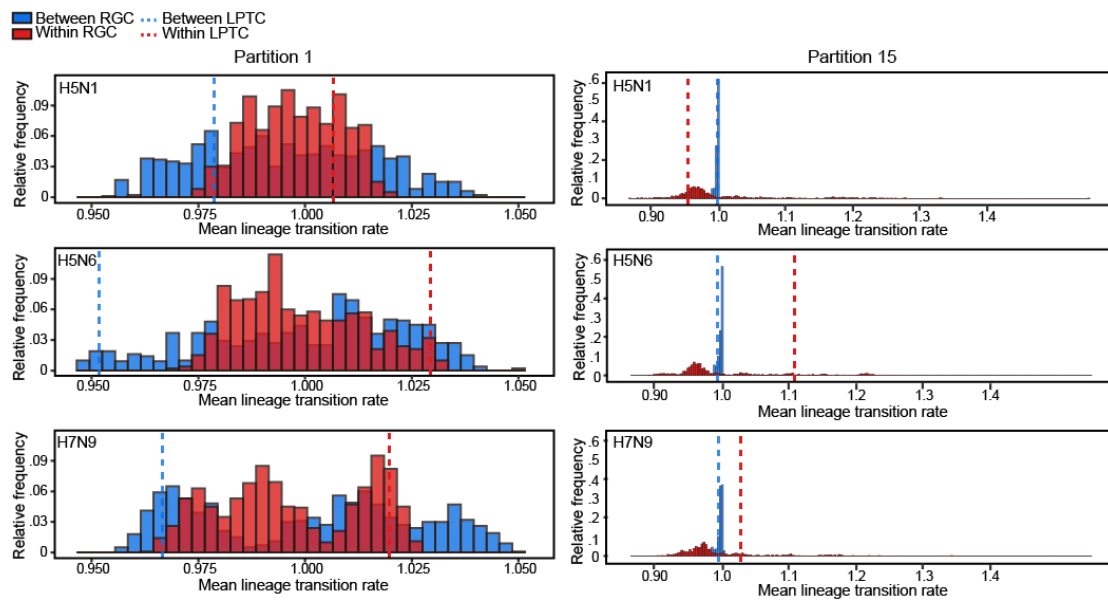

442

443 **Fig. S10. Histograms of mean among-location AIV lineage transition rates**  
 444 **(Partition 1 and 15).** The raw transition rates between locations are obtained from the  
 445 analyses reported in Fig. 1. Two means are shown here: blue = mean transition rate  
 446 for pairs of locations in different live poultry trade communities (LPTCs); red = mean  
 447 transition rate for pairs of locations in the same LPTC. Dotted vertical lines show  
 448 these two means calculated using the partition of the empirically-derived (“true”)  
 449 LPTC network.

450

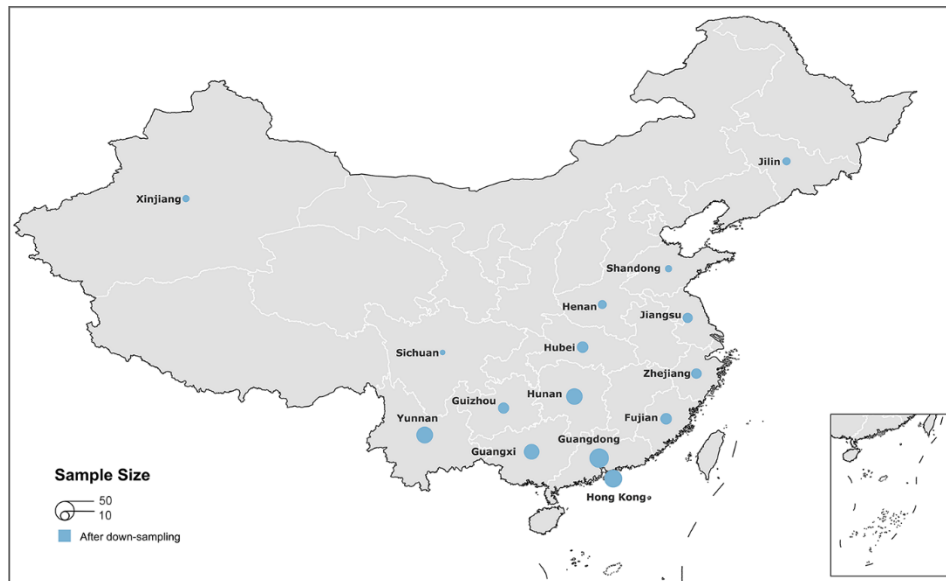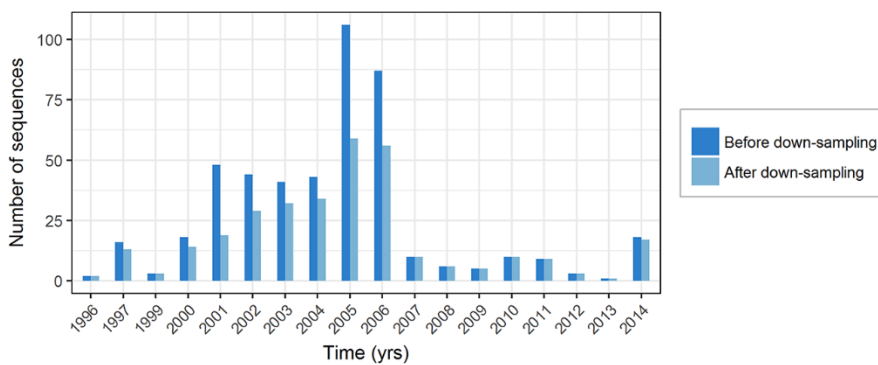

451

452 **Fig. S11a. Spatial and Temporal distribution of HA sequences of H5N1 viruses**  
 453 **used in this study before/after down-sampling.** Upper panel: Spatial distribution of  
 454 HA sequences from domestic poultry between provinces in China after  
 455 down-sampling. Pie size represents the number of sequences. Lower panel: Temporal  
 456 distribution of HA sequences from domestic poultry from 1996 to 2017. The dark bar  
 457 represents sequences before down-sampling and the light bars represent  
 458 down-sampled sequences.

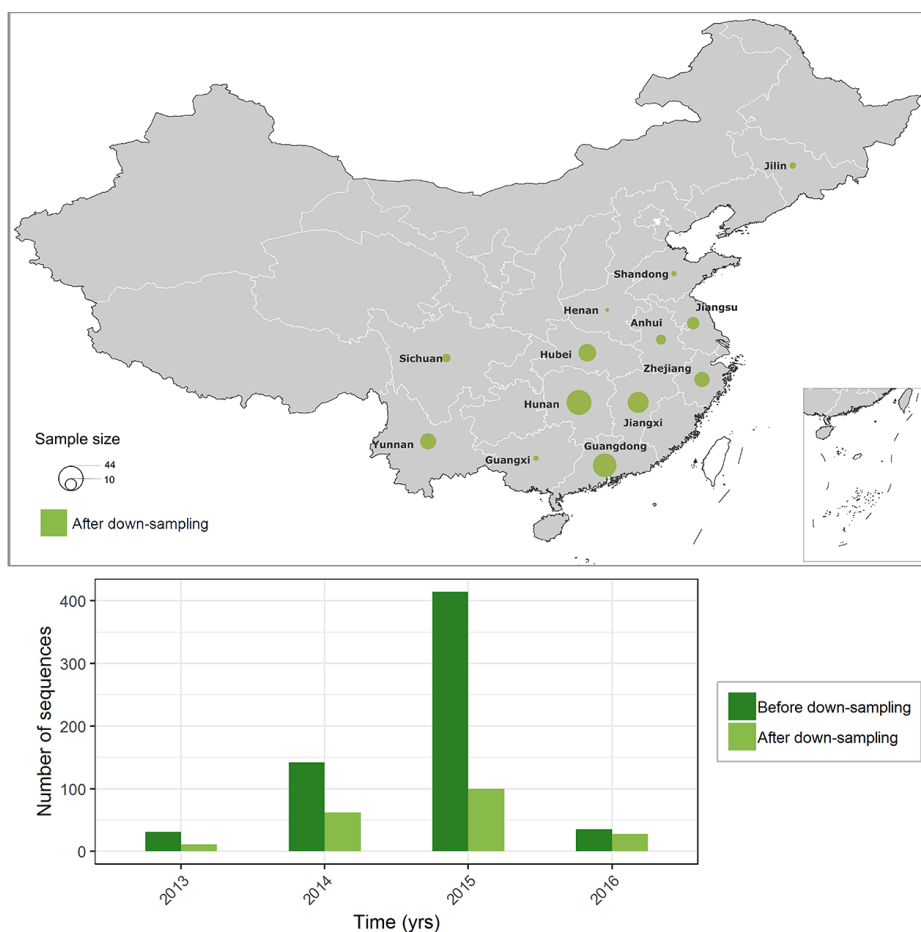

459

460 **Fig. S11b. Spatial and Temporal distribution of HA sequences of H5N6 viruses**  
 461 **used in this study before/after down-sampling.** Upper panel: Spatial distribution of  
 462 HA sequences from domestic poultry between provinces in China after  
 463 down-sampling. Pie size represents the number of sequences. Lower panel: Temporal  
 464 distribution of HA sequences from domestic poultry from 2013 to 2018. The dark bar  
 465 represents sequences before down-sampling and the light bars represent  
 466 down-sampled sequences.

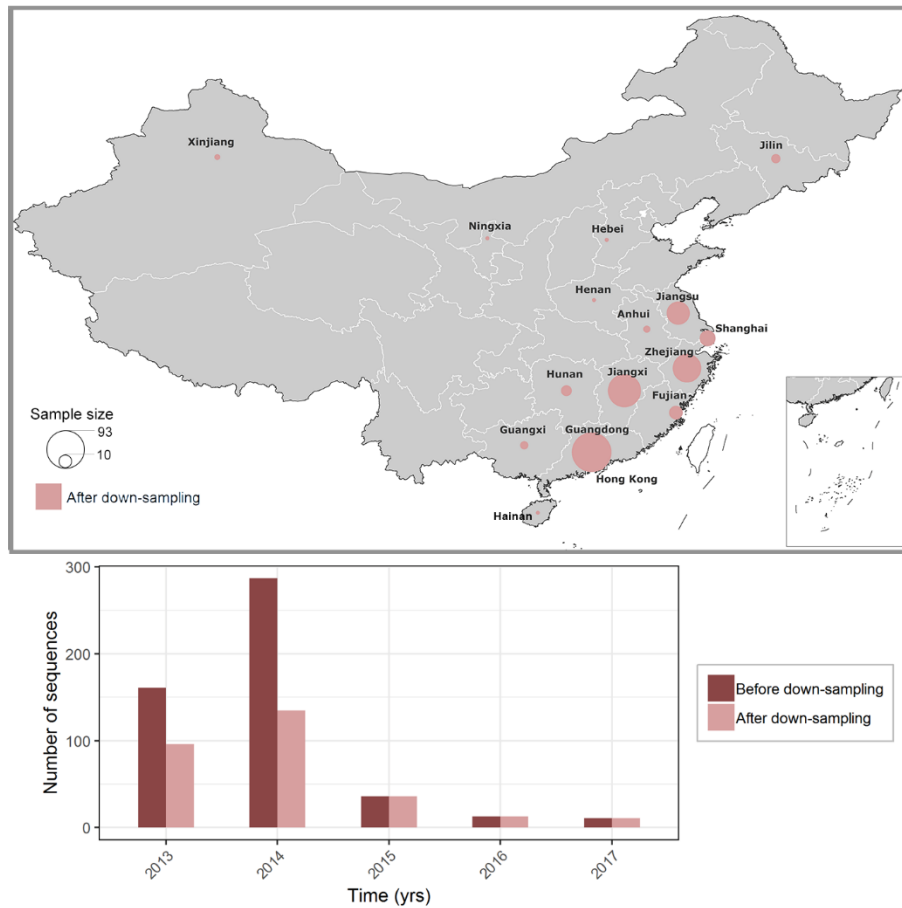

467

468 **Fig. S11c. Spatial and Temporal distribution of HA sequences of H7N9 viruses**  
 469 **used in this study before/after down-sampling.** Upper panel: Spatial distribution of  
 470 HA sequences from domestic poultry between provinces in China after  
 471 down-sampling. Pie size represents the number of sequences. Lower panel: Temporal  
 472 distribution of HA sequences from domestic poultry from 2013 to 2017. The dark bar  
 473 represents sequences before down-sampling and the light bars represent  
 474 down-sampled sequences.

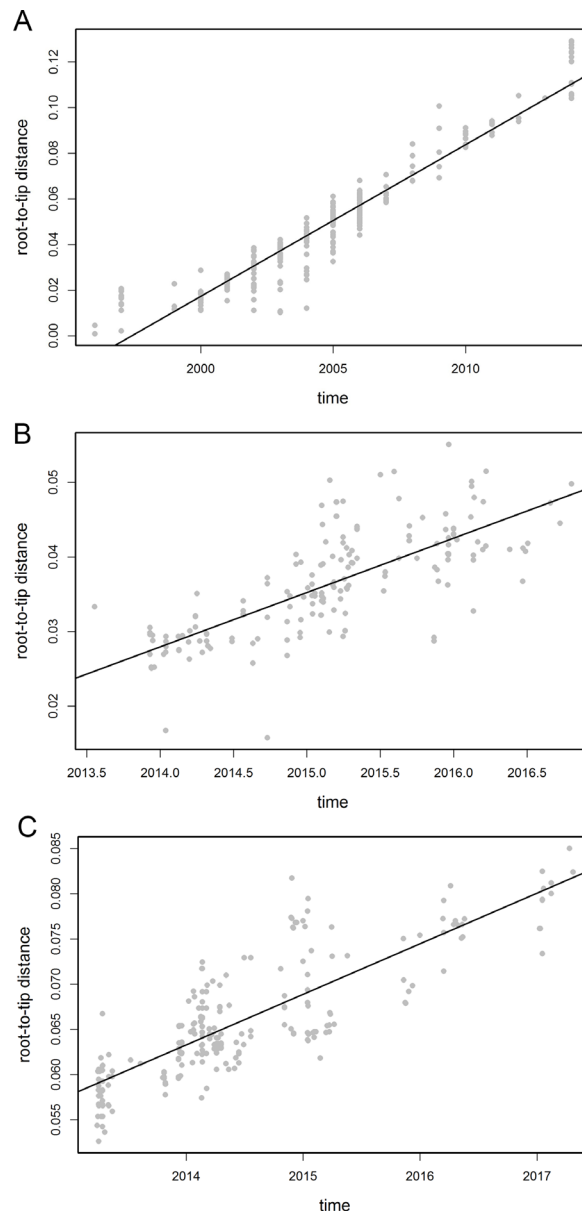

475

476 **Fig. S12. Strong temporal signal tested in TempEst of H5N1 (A), H5N6 (B) and**  
 477 **H7N9 (C).** We used the subsampled dataset of sequences of the HA gene segments of  
 478 each subtype of viruses isolated from domestic poultry in China in this test.



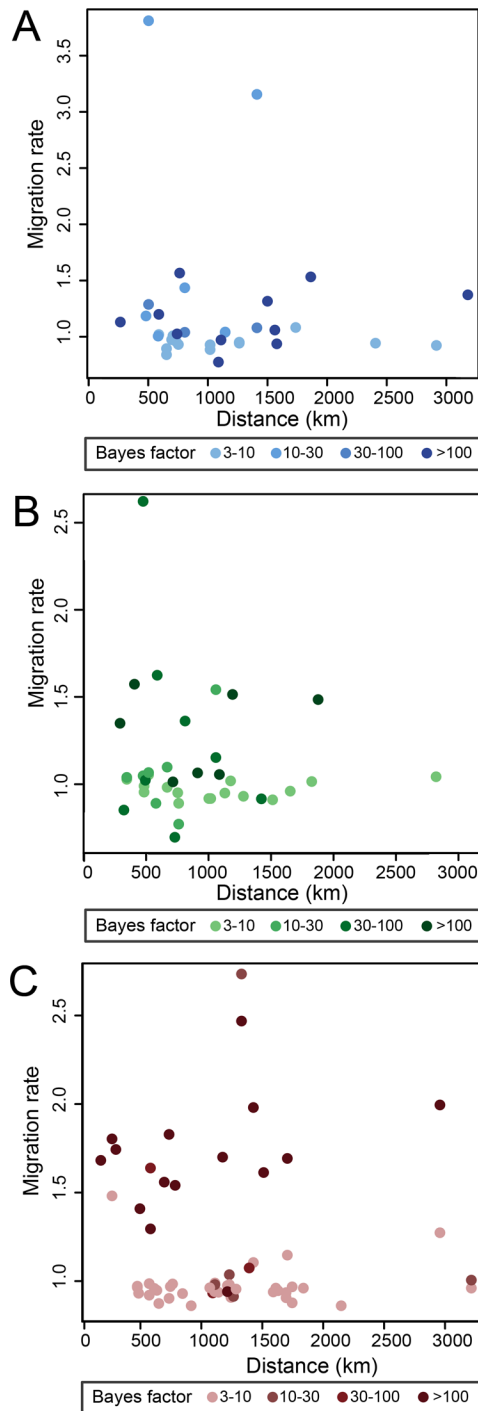

479

480 **Fig. S13. No associated between lineage migration rates and distances when**  
 481 **sequence locations of AIV subtypes H5N1, H5N6 and H7N9 are randomized**  
 482 **before phylogeographic analysis using the same method and datasets used in**  
 483 **Figure 1. (A) H5N1 ( $R = -0.052$ ,  $P = 0.765$ ); (B) H5N6 ( $R = -0.096$ ,  $P = 0.566$ ); and**  
 484 **(C) H7N9 ( $R = -0.096$ ,  $P = 0.566$ ).**

485

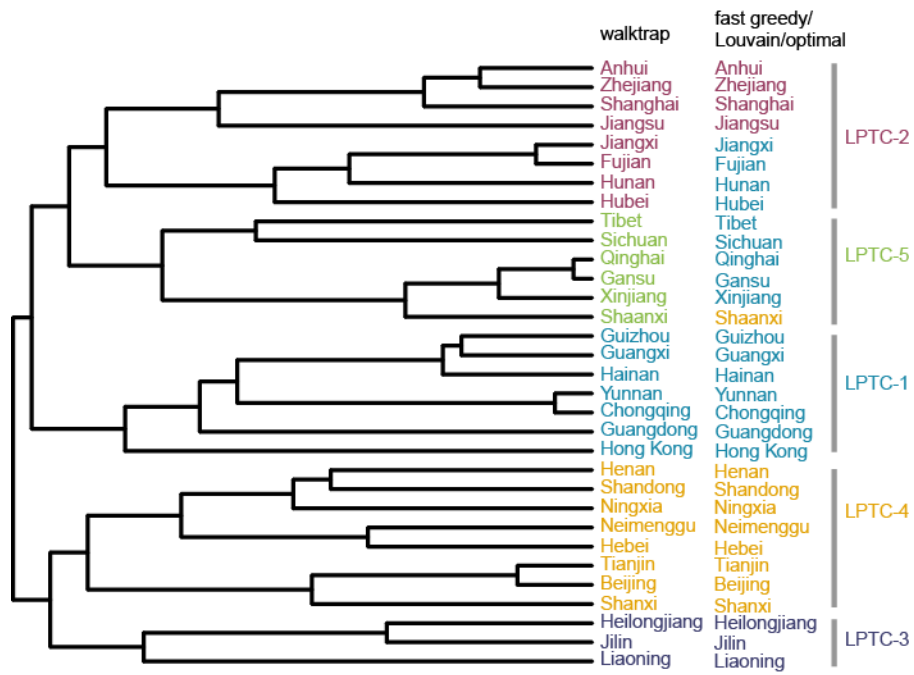

486

487 **Fig. S14. Community detection using Walktrap, Fast Greedy, Louvain,**  
 488 **modularity optimization.** The hierarchical structure in the left panel is identified  
 489 using the Walktrap algorithm. Location are coloured according to the communities  
 490 detected by Walktrap (left column), and by fast greedy, Louvain and modularity  
 491 optimization (right column).

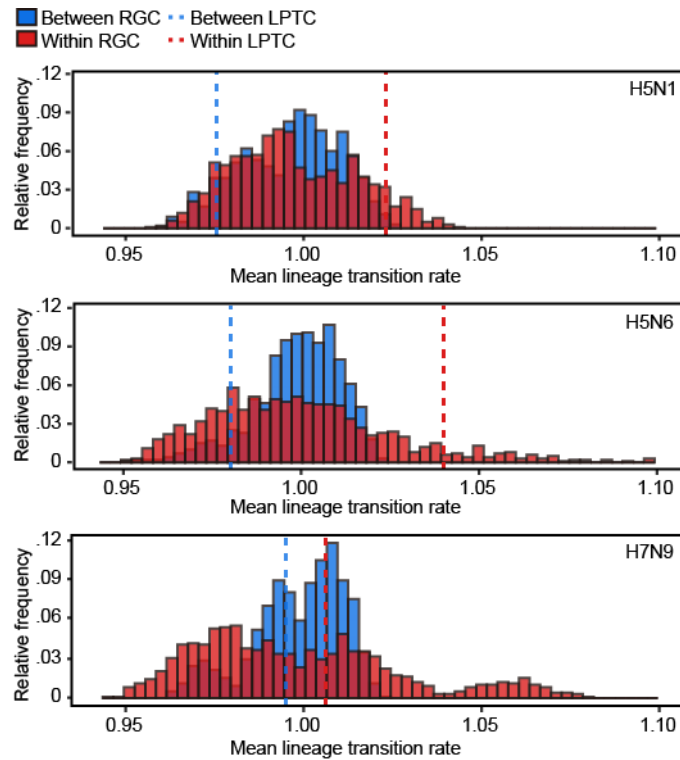

492

493 **Fig. S15. Histograms of mean AIV lineage transition rates among-location with**  
 494 **communities detected by the Fast Greedy, Louvain, modularity optimization.**  
 495 The raw transition rates between locations are obtained from the analyses reported in  
 496 Fig. 1. Two means are shown here: blue = mean transition rate for pairs of locations  
 497 in different communities; red = mean transition rate for pairs of locations in the same  
 498 community. Dotted vertical lines show these two means calculated using the partition  
 499 of the empirically-derived (“true”) LPTC network.

**Table S1. Generalized linear model results (controlling for viral sample size)**

| <b>Predictor</b>      | <b>Inclusion*</b> | <b>BF<sup>†</sup></b> | <b>cEffect (95% HPD)<sup>‡</sup></b> |
|-----------------------|-------------------|-----------------------|--------------------------------------|
| <b>H5N1</b>           |                   |                       |                                      |
| Viral sample size (D) | 1                 | infinite              | 0.588 (0.370,0.811)                  |
| Poultry trade         | 0.193             | 9                     | 1.200 (0.678, 1.772)                 |
| Bird migration        | 0.807             | 149                   | 1.478 (0.925, 2.007)                 |
| <b>H5N6</b>           |                   |                       |                                      |
| Viral sample size (D) | 1                 | infinite              | 0.776 (0.442, 1.138)                 |
| Poultry trade         | 0.814             | 156                   | 0.630 (0.128, 1.194)                 |
| Bird migration        | 0.186             | 8                     | 0.621 (-0.239, 1.413)                |
| <b>H7N9</b>           |                   |                       |                                      |
| Viral sample size (D) | 1                 | infinite              | 0.871 (0.581, 1.176)                 |
| Poultry trade         | 0.912             | 367                   | 1.159 (0.315, 2.020)                 |
| Bird migration        | 0.088             | 3                     | 0.669 (-0.257, 1.477)                |

\*Inclusion, probability that the predictor was included in the model.

<sup>†</sup>BF, Bayes factor.

<sup>‡</sup>cEffect, conditional effect size, which represents the estimate of the coefficient conditional on the predictor being included in the model. Both the mean and the 95% highest posterior density credible interval (95% HPD) of the conditional effect size are reported.

**Table S2. Out-degree and in-degree of province nodes in live poultry trade network.**

|              | out-degree | in-degree |
|--------------|------------|-----------|
| Beijing      | 0.0066691  | 0.0170491 |
| Tianjin      | 0.0046496  | 0.0104736 |
| Hebei        | 0.1070538  | 0.0637392 |
| Shanxi       | 0.0163548  | 0.0382506 |
| Neimenggu    | 0.007919   | 0.0149981 |
| Liaoning     | 0.0389668  | 0.0246289 |
| Jilin        | 0.0199215  | 0.0170071 |
| Heilongjiang | 0.0147619  | 0.0199825 |
| Shanghai     | 0.0044865  | 0.0173906 |
| Jiangsu      | 0.077618   | 0.0774893 |
| Zhejiang     | 0.0236046  | 0.0443643 |
| Anhui        | 0.0605377  | 0.067238  |
| Fujian       | 0.0146695  | 0.0218523 |
| Jiangxi      | 0.0398436  | 0.0369054 |
| Shandong     | 0.1180784  | 0.0743098 |
| Henan        | 0.1252846  | 0.0848688 |
| Hubei        | 0.0621741  | 0.0543692 |
| Hunan        | 0.0509017  | 0.0538547 |
| Guangdong    | 0.0516537  | 0.0516608 |
| Guangxi      | 0.0336637  | 0.0258277 |
| Hainan       | 0.0055096  | 0.0042646 |
| Chongqing    | 0.0171049  | 0.0215302 |
| Sichuan      | 0.0530139  | 0.0454635 |
| Guizhou      | 0.0111807  | 0.0244125 |
| Yunnan       | 0.0136839  | 0.0222702 |
| Tibet        | 7.65E-05   | 0.0007838 |
| Shannxi      | 0.0101696  | 0.0319031 |
| Gansu        | 0.00568    | 0.0151643 |
| Qinghai      | 0.0003532  | 0.0028651 |
| Ningxia      | 0.0015283  | 0.0036118 |
| Xinjiang     | 0.002401   | 0.00497   |
| Hong_Kong    | 0.0004851  | 0.0065007 |

**Table S3. Out-degree and in-degree of province nodes in gene flow network.**

|           | out-degree  | in-degree   |
|-----------|-------------|-------------|
| Hebei     | 0.046641746 | 0.046641745 |
| Shanxi    | 0.013095849 | 0.013095849 |
| Liaoning  | 0.046641746 | 0.046641746 |
| Jilin     | 0.023406387 | 0.023235359 |
| Jiangsu   | 0.034449901 | 0.033961251 |
| Zhejiang  | 0.028097438 | 0.028390628 |
| Anhui     | 0.050550955 | 0.050550955 |
| Fujian    | 0.023504117 | 0.023650713 |
| Jiangxi   | 0.040875663 | 0.040875663 |
| Shandong  | 0.032959515 | 0.033350437 |
| Henan     | 0.072784578 | 0.072637981 |
| Hubei     | 0.085074153 | 0.085171883 |
| Hunan     | 0.092135161 | 0.092232891 |
| Guangdong | 0.072295928 | 0.0721249   |
| Guangxi   | 0.04439395  | 0.044540547 |
| Chongqing | 0.026069535 | 0.026069535 |
| Sichuan   | 0.041217719 | 0.041119988 |
| Guizhou   | 0.047570183 | 0.047570182 |
| Yunnan    | 0.022502382 | 0.02247795  |
| Shaanxi   | 0.063133719 | 0.06313372  |
| Gansu     | 0.045933201 | 0.045933201 |
| Xinjiang  | 0.022942168 | 0.022991033 |
| Hong_Kong | 0.02372401  | 0.023601847 |

**Table S4. Indicators and data sources of statistics.**

| <b>Indicator</b>                          | <b>Mainland China (except HK)</b>                                   | <b>Source</b>             | <b>HK</b>                                                    | <b>Source</b>             |
|-------------------------------------------|---------------------------------------------------------------------|---------------------------|--------------------------------------------------------------|---------------------------|
| <b>Poultry population</b>                 | RESID <sup>a</sup>                                                  | EPS <sup>b</sup>          | Maximum Rearing Capacity                                     | ACFD <sup>c</sup>         |
| <b>Poultry production</b>                 | Slaughtered poultry                                                 | NBS <sup>d</sup>          | Estimated Quantities of Chickens, ducks and quails           | ACFD                      |
| <b>Poultry egg production</b>             | Output of poultry eggs                                              | NBS                       | Estimated Quantities of Hatching Hen Eggs and Table Hen Eggs | ACFD                      |
| <b>Poultry meat production</b>            | Output of poultry meat                                              | EPS                       | Local production of live poultry                             | ACFD                      |
| <b>Human population</b>                   | Total population                                                    | EPS                       | Total Population                                             | World Bank Open Data      |
| <b>Poultry egg consumption per capita</b> | Per capita consumption expenditure of rural households, poultry egg | EPS                       | Poultry egg consumption / Human population                   | Calculation of statistics |
| <b>Poultry egg consumption</b>            | Poultry egg consumption per capita × Human population               | Calculation of statistics | Eggs of wholesale markets throughput                         | ACFD                      |
| <b>Poultry consumption per capita</b>     | Per capita consumption expenditure of rural households, poultry     | EPS                       | Consumption of live poultry / Human population               | Calculation of statistics |
| <b>Poultry consumption</b>                | Poultry consumption per capita × Human population                   | Calculation of statistics | Consumption of live poultry                                  | ACFD                      |

- a. RESID is the abbreviation of number of individuals existing at the end of the calendar year(residual poultry);
- b. Database: EPS China data (<http://www.epschinadata.com/>) offering time serial statistical data (including census data) from statistical yearbooks;
- c. Agriculture, Fisheries and Conservation Department, The Government of the Hong Kong Special Administrative Region;
- d. National Bureau of Statistics;

**Additional Dataset S1 (separate file)**

Permutation of community structure and comparison.

**Additional Dataset S2 (separate file)**

Accession number of all sequences in this study.

**Additional Dataset S3 (separate file)**

Original data of predictors for GLM.
